# Supplementary material for: Sex determination mode does not affect body or genital development of the central bearded dragon (Pogona vitticeps)
Source: PubMed Central journal article supplement (PMC5716226; doi:10.1186/s13227-017-0087-5), 2017-12-04
Supplement: 13227_2017_87_MOESM6_ESM.pdf [file 13227_2017_87_MOESM6_ESM.pdf]

Weight (Grams)

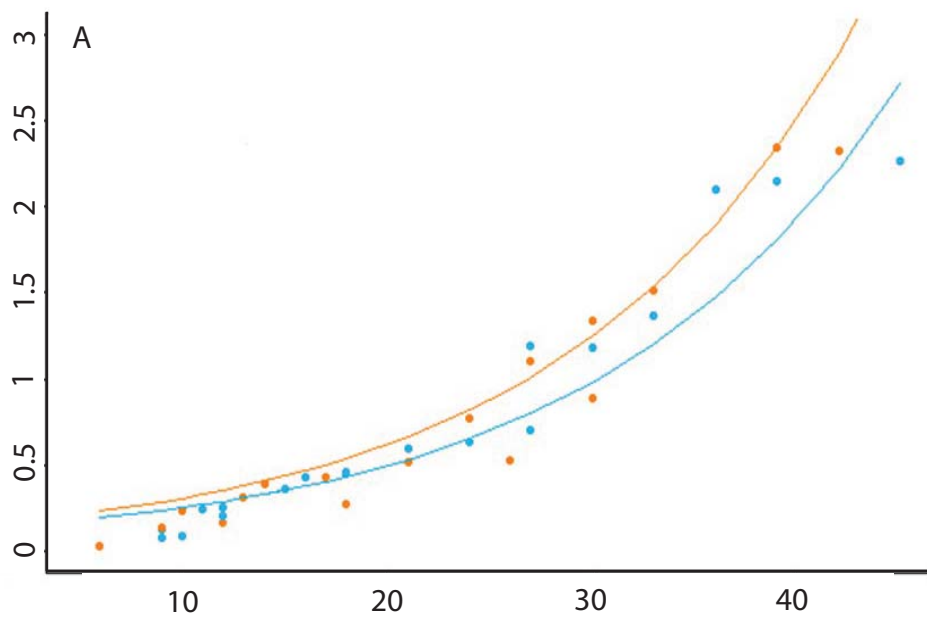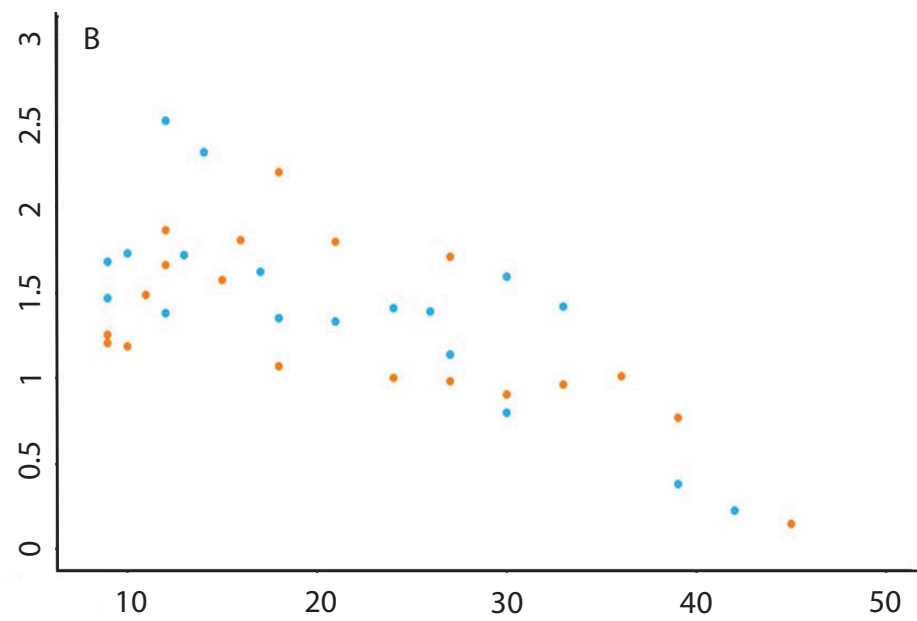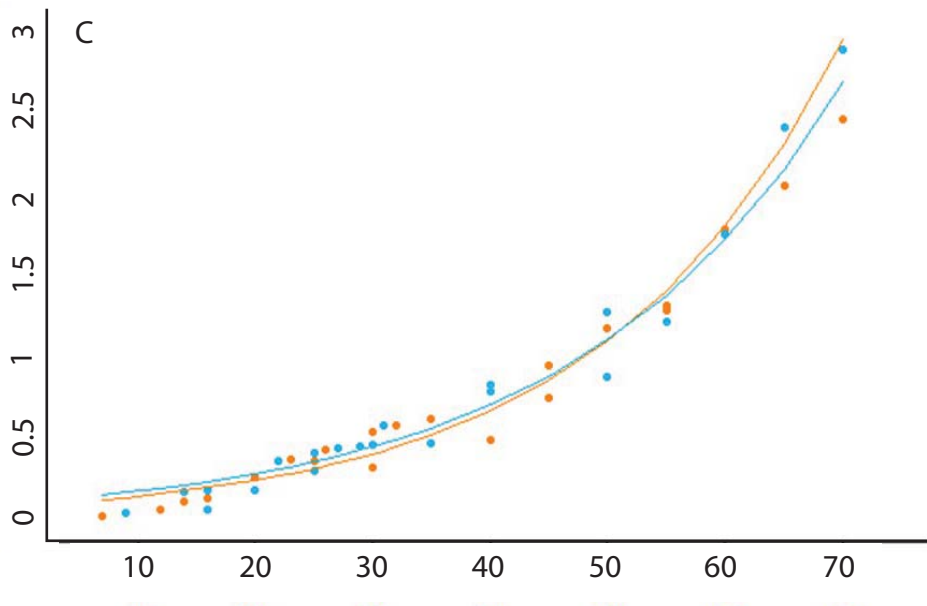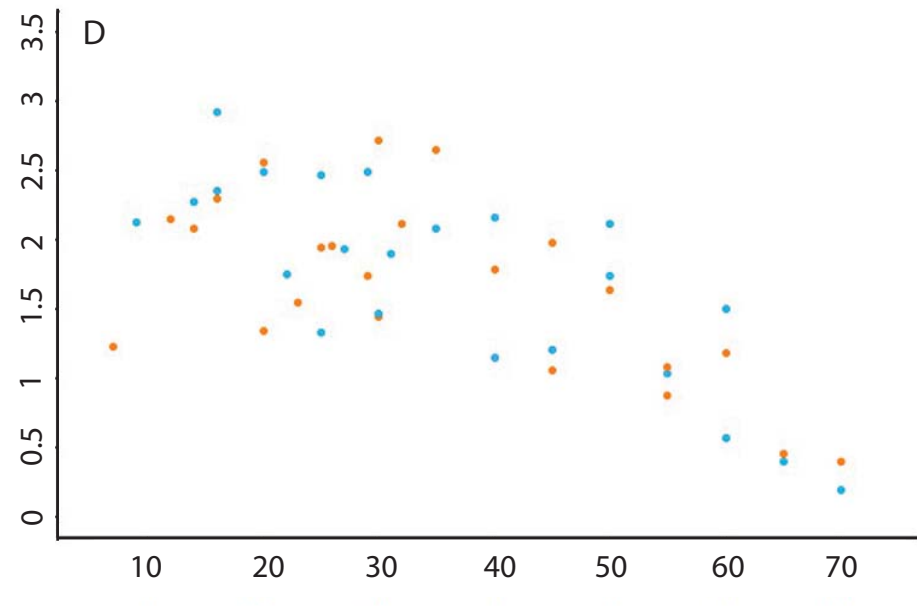

Age (Days Post-Oviposition)
